# Supplementary material for: Annexin A2 Regulates AKT Upon H2O2-Dependent Signaling Activation in Cancer Cells
Source: PubMed Central journal article supplement (PMC6520733; doi:10.3390/cancers11040492), 2019-04-07
Supplement: cancers-11-00492-s001.pdf [file cancers-11-00492-s001.pdf]

# Supplementary Materials: Annexin A2 Regulates AKT upon H<sub>2</sub>O<sub>2</sub>-Dependent Signaling Activation in Cancer Cells

Stéphanie Anais Castaldo, Tom Ajime, Gisela Serrão, Fábio Anastácio, Joana Teixeira Rosa, Carman Anthony Giacomantonio, Alison Howarth, Richard Hill and Patrícia Alexandra Madureira

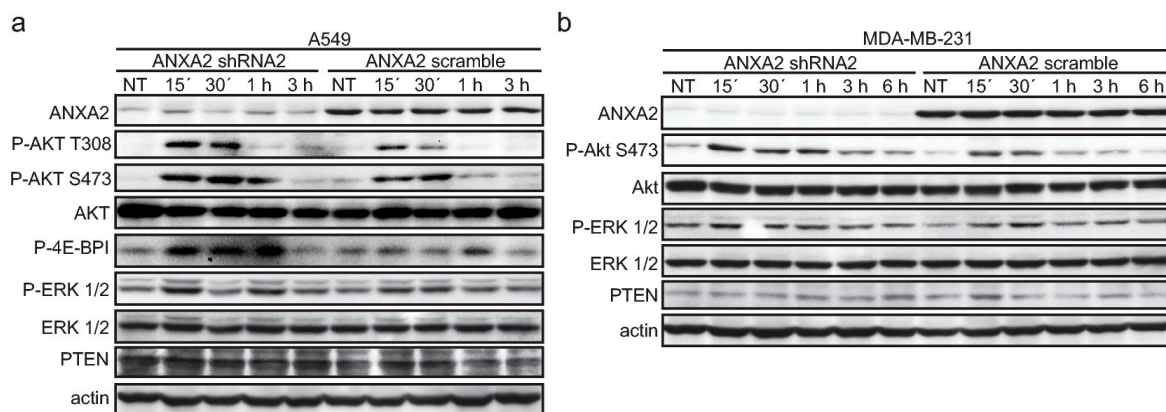

**Figure S1.** ANXA2 depleted cancer cells show enhanced AKT phosphorylation/activation upon EGF treatment compared to control cells. (a) A549, or (b) MDA-MB-231 cancer cells depleted of ANXA2 (ANXA2 shRNA1) or controls (ANXA2 scramble) were serum starved for 16 h and either not treated (NT) or treated with 15 nM EGF for the times indicated. After what cells were lysed and 20 µg of each protein extract was subjected to SDS-PAGE, transferred onto nitrocellulose membranes and analyzed by western blotting with the antibodies indicated. Results are representative of three independent experiments ( $N = 3$ ).

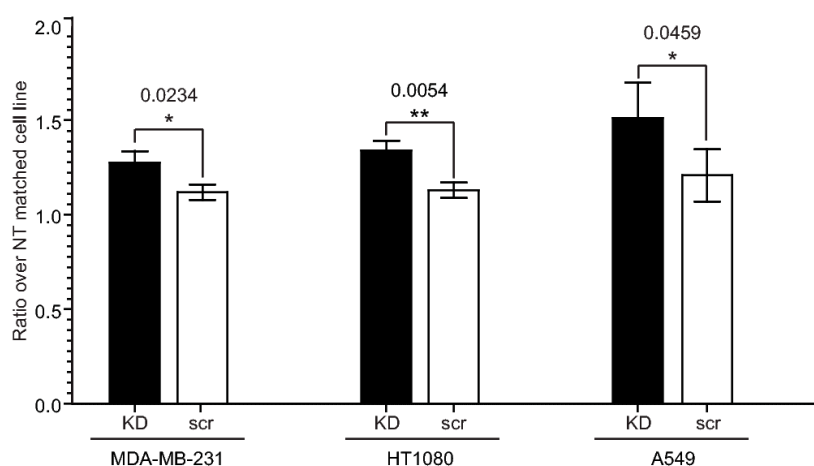

**Figure S2.** ANXA2 depleted cells show higher proliferation rate compared to matched control cells following EGF treatment. MDA-MB-231 ANXA2 shRNA2 (KD) and scramble (scr); HT1080 ANXA2 shRNA2 (KD) and scramble (scr); or A549 ANXA2 shRNA2 (KD) and scramble (scr) cells were serum starved for 16 h, after what they were either not treated (NT) or treated with 15 nM of EGF for 24 h. Cell proliferation was determined by using the CellTiter 96 AQueous Non-Radioactive Cell Proliferation Assay (Promega) according to the manufacturer's instructions. Error bars represent the standard deviation obtained from three independent experiments. Statistical analysis was evaluated

using two-tailed Student's *t*-test. In every case a *p*-value of less than 0.05 (\*), less than 0.01(\*\*) and 0.001 (\*\*\*) was considered statistically significant.

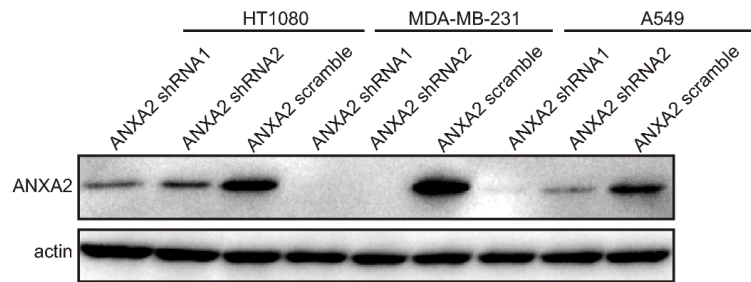

**Figure S3.** Analysis of ANXA2 shRNAs cancer cell lines. HT1080 (left lanes); MDA-MB-231 (middle lanes) or A549 (right lanes) ANXA2 shRNA1; ANXA2 shRNA2 or ANXA2 scramble cell lines were plated in 60 mm plates for 48 h. After what cells were lysed and 20  $\mu$ g of each protein extract was subjected to SDS-PAGE, transferred onto nitrocellulose membranes and analyzed by western blotting with the antibodies indicated. Results are representative of three independent experiments ( $N = 3$ ).

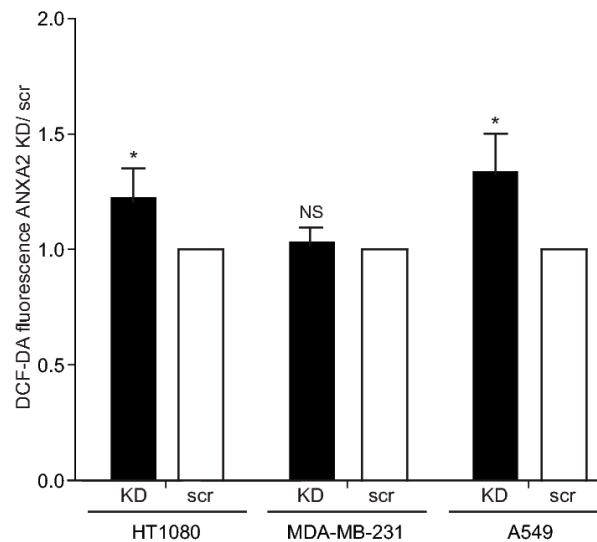

**Figure S4.** Analysis of intracellular ROS levels in ANXA2 depleted versus control cells. HT1080 ANXA2 shRNA2 (KD) and scramble (scr); MDA-MB-231 ANXA2 shRNA2 (KD) and scramble (scr); or A549 ANXA2 shRNA2 (KD) and scramble (scr) cells were incubated with 50  $\mu$ M of DCF-DA for 30 min at 37  $^{\circ}$ C, 5% CO<sub>2</sub>. After what fluorescence was measured (Excitation: 488 nm, Emission: 535 nm) using a fluorometer plate reader. Error bars represent the standard deviation obtained from three independent experiments. Statistical analysis was evaluated using two-tailed Student's *t*-test. In every case a *p*-value of less than 0.05 (\*), less than 0.01 (\*\*) and 0.001 (\*\*\*) was considered statistically significant.

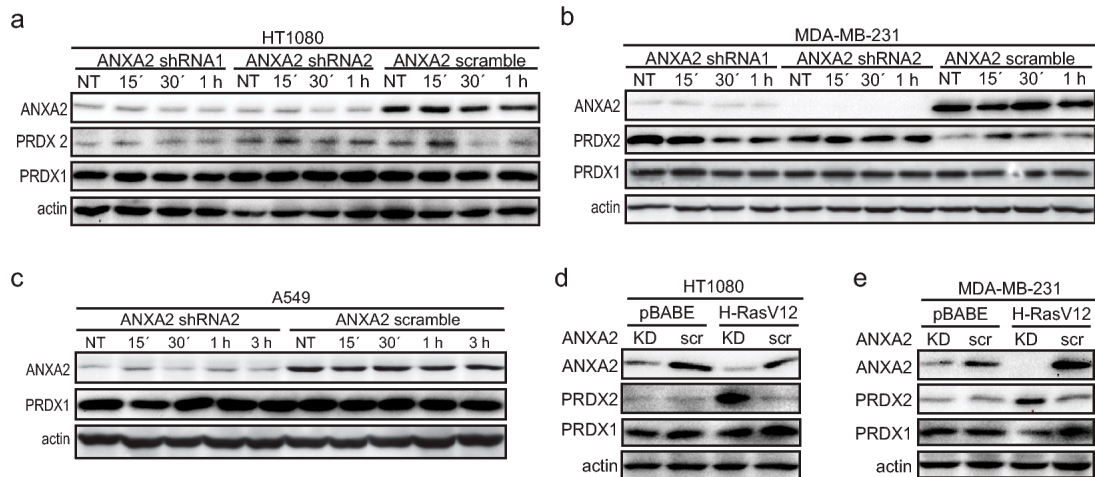

**Figure S5.** Analysis of PRDX2 expression in ANXA2 KD cancer cells. (a) HT1080, (b) MDA-MB-231, (c) A549 cancer cells depleted of ANXA2 (ANXA2 shRNA1, ANXA2 shRNA2) or controls (ANXA2 scramble) were serum starved for 6 h (HT1080) or for 16 h (MDA-MB-231) and either not treated (NT) or treated with 15 nM EGF for the times indicated; (d) HT1080 or (e) MDA-MB-231 ANXA2 knockdown (KD) and control (scr) cells expressing H-RasV12 or the empty vector pBABE were grown in serum free media for 6 h or 16 h, respectively. After what cells were lysed and 20  $\mu$ g of each protein extract was subjected to SDS-PAGE, transferred onto nitrocellulose membranes and analyzed by western blotting with the antibodies indicated. Results are representative of at least three independent experiments.

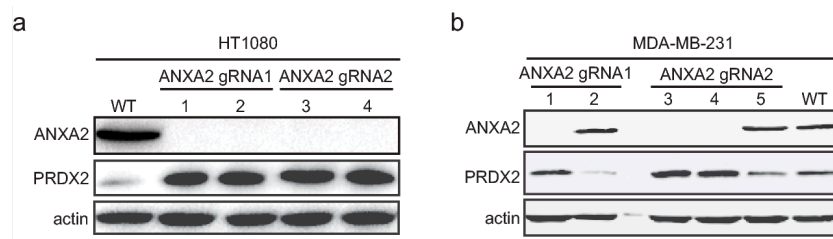

**Figure S6.** HT1080 and MDA-MB-231 ANXA2 knockout cells show enhanced PRDX2 expression compared to control cells. (a) HT1080 or (b) MDA-MB-231 cells were transfected with p36 gRNA-pX459 V2.0 CRIPR/Cas9 plasmids, selected with puromycin and serial dilutions were performed for selection of sub-populations. After what cells were lysed and 20  $\mu$ g of each protein extract was subjected to SDS-PAGE, transferred onto nitrocellulose membranes and analyzed by western blot with the antibodies indicated.

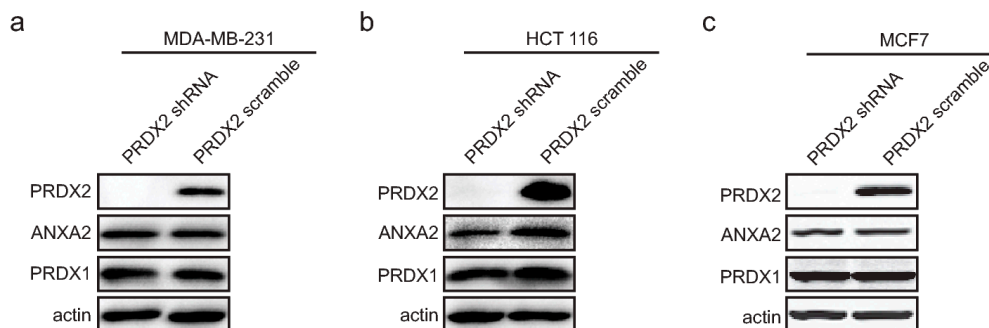

**Figure S7.** PRDX2 depleted cancer cells show identical levels of ANXA2 expression compared to control cells. (a) MDA-MB-23, (b) HCT 116, or (c) MCF7 cancer cells depleted of PRDX2 (PRDX2 shRNA1) or controls (PRDX2 scramble) were plated in a 60 mm plate containing DMEM complete media for 48 h. After what cells were lysed and 20  $\mu$ g of each protein extract was subjected to SDS-

PAGE, transferred onto nitrocellulose membranes and analyzed by western blotting with the antibodies indicated.

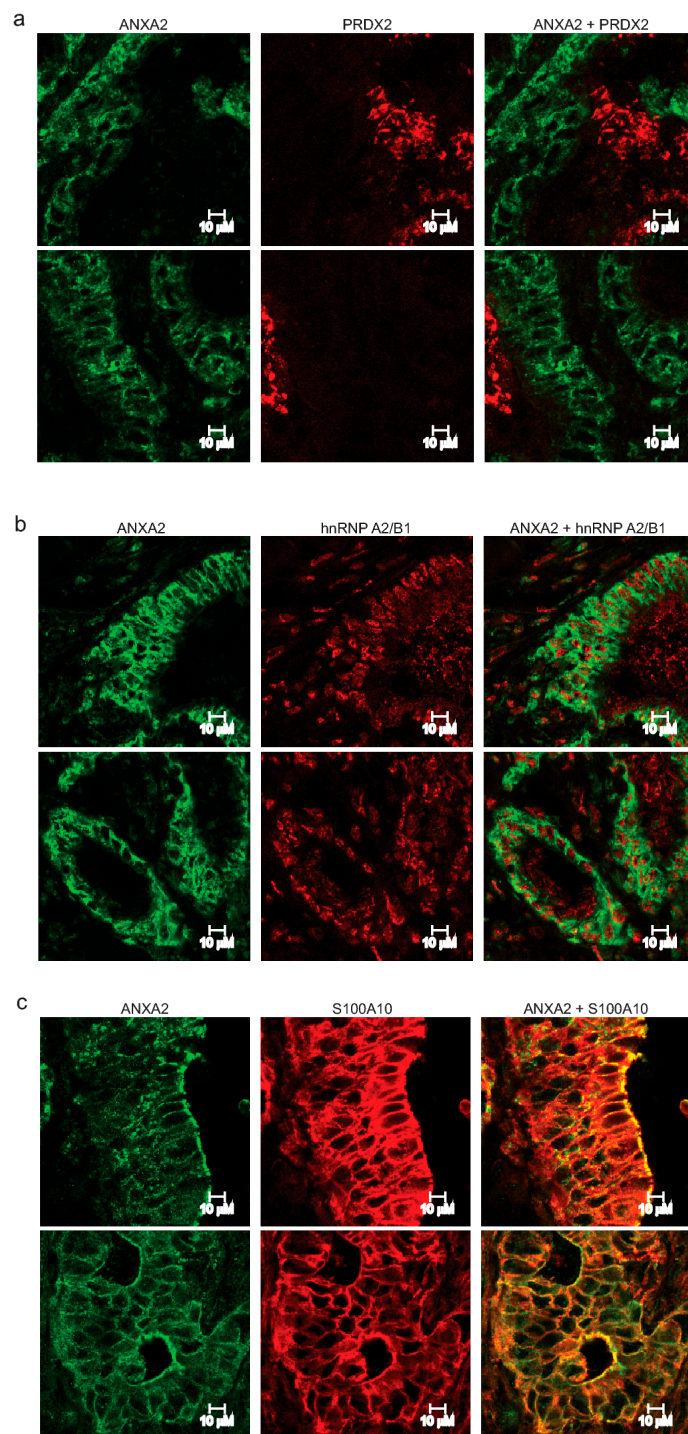

**Figure S8.** Immunofluorescence staining of ANXA2 and PRDX2 in colon clinical samples. Tumor clinical samples were flash frozen and sectioned using a cryostat. Samples were then fixed with methanol and immuno-stained with the antibodies indicated, followed by immunofluorescence staining with secondary antibodies (ANXA2-green; PRDX2-red). (a) ANXA2 and PRDX2 staining; (b) ANXA2 and hnRNP A2/B1 (nuclear marker) staining; (c) ANXA2 and S100A10 staining.

**Table S1.** Analysis of ROS related genes in ANXA2 depleted versus control cancer cells. HT1080 ANXA2 KO #1; ANXA2 KO #2 or WT or MDA-MB-231 ANXA2 shRNA1; ANXA2 shRNA2 or ANXA2 scramble cells were plated in 100 mm plates for 48 h. After what RNA extraction was performed using the RNeasy mini kit (QIAGEN) according to the manufacturer's instructions. A panel of 86 ROS dependent genes was analysed using the RT<sup>2</sup> Profiler™ PCR Array Human Oxidative Stress (Qiagen) according to the manufacturer's instructions in a LightCycler 96 instrument (Roche). Results are expressed as fold induction compared to controls (HT1080 WT and MDA-MB-231 ANXA2 scramble, respectively).

| GENE   | HT1080      |             | MDA MB 231   |              |
|--------|-------------|-------------|--------------|--------------|
|        | ANXA2 KO #1 | ANXA2 KO #2 | ANXA2 shRNA1 | ANXA2 shRNA2 |
| ALB    | 1.6596      | 3.5991      | 2.6579       | 0.5932       |
| ALOX12 | 0.5908      | 0.3836      | 0.8952       | 1.6319       |
| AOX1   | 0.7427      | 0.6819      | 0.8952       | 1.0186       |
| APOE   | 0.5908      | 1.7996      | 0.7902       | 0.6015       |
| ATOX1  | 1.3955      | 1.4119      | 1.0212       | 0.9244       |
| BNIP3  | 0.8832      | 0.8752      | 0.6463       | 0.5932       |
| CAT    | 1.4751      | 2.0106      | 0.5626       | 0.7303       |
| CCL5   | 7.4685      | 5.1253      | 0.7476       | 0.0876       |
| CCS    | 0.785       | 1.7871      | 1.0945       | 1.5546       |
| CYBB   | 0.5908      | 0.3836      | 0.6072       | 0.7252       |
| CYGB   | 2.2358      | 2.9437      | 0.9661       | 0.26         |
| DHCR24 | 1.0798      | 1.5558      | 0.4034       | 0.6814       |
| DUOX1  | 0.5908      | 0.3836      | 0.2003       | 0.1463       |
| DUOX2  | 0.5908      | 0.3836      | 0.7847       | 0.6184       |
| DUSP1  | 1.6481      | 0.0113      | 0.889        | 1.3347       |
| EPHX2  | 0.1936      | 0.1257      | 0.7847       | 0.6184       |
| EPX    | 0.5908      | 0.4376      | 0.525        | 0.7303       |
| FOXO1  | 0.9868      | 0.9984      | 1.0499       | 1.3255       |
| FTTH1  | 1.7664      | 1.5558      | 0.7793       | 0.7613       |
| GCLC   | 0.7478      | 0.4957      | 0.9728       | 0.9636       |
| GCLM   | 1.2149      | 0.9846      | 0.9462       | 0.7881       |
| GPX1   | 1.249       | 1.6219      | 0.8952       | 1.4108       |
| GPX2   | 0.865       | 1.1548      | 0.5286       | 2.2138       |
| GPX3   | 0.5908      | 0.4346      | 0.603        | 0.6227       |
| GPX4   | 1.1414      | 1.085       | 0.8587       | 0.8745       |
| GPX5   | 0.5908      | 0.3836      | 0.7847       | 0.6184       |
| GPX6   | 0.5908      | 0.3836      | 0.7847       | 0.6184       |
| GPX7   | 0.5908      | 0.3836      | 0.7793       | 0.3968       |
| GSR    | 0.6601      | 0.8166      | 0.5511       | 2.0091       |
| GSS    | 0.9466      | 1.345       | 1.395        | 2.3239       |
| GSTP1  | 0.8591      | 1.3544      | 1.1894       | 1.5439       |
| GSTZ1  | 0.8472      | 2.7088      | 1.4951       | 2.1533       |
| GTF2I  | 0.9937      | 1.2291      | 0.8528       | 0.9703       |
| HMOX1  | 0.8241      | 1.3544      | 0.4602       | 1.1459       |
| HSPA1A | 0.5143      | 1.1078      | 0.8647       | 1.2453       |
| KRT1   | 0.5908      | 0.3836      | 0.7847       | 0.6184       |
| LPO    | 0.5908      | 0.3836      | 0.7847       | 0.6184       |
| MB     | 0.5362      | 0.4468      | 1.3289       | 0.5651       |
| MBL2   | 0.5908      | 0.3836      | 0.7847       | 0.6184       |
| MGST3  | 1.0006      | 1.255       | 0.9661       | 0.9839       |
| MPO    | 0.5908      | 0.3836      | 0.7847       | 0.6184       |
| MPV17  | 1.2149      | 1.5666      | 0.9728       | 1.4206       |
| MSRA   | 0.5868      | 1.4617      | 0.7476       | 1.7858       |
| MT3    | 0.5908      | 0.3836      | 0.7847       | 0.7936       |
| NCF1   | 3.8127      | 1.4924      | 0.457        | 0.8991       |
| NCF2   | 0.2873      | 0.4316      | 0.4476       | 0.4988       |
| NOS2   | 0.5908      | 0.3836      | 0.7847       | 0.6184       |
| NOX4   | 0.871       | 0.7011      | 0.5397       | 0.918        |
| NOX5   | 0.5908      | 0.3836      | 3.2722       | 1.7012       |
| NQO1   | 1.3763      | 1.3829      | 1.0646       | 0.756        |

Table S1. Cont.

|        |        |        |        |        |
|--------|--------|--------|--------|--------|
| NUDT1  | 1.0006 | 1.8247 | 1.395  | 2.4226 |
| OXR1   | 1.3574 | 1.0553 | 0.7322 | 0.8745 |
| OXSR1  | 0.9598 | 0.6587 | 0.8012 | 0.7456 |
| PDLIM1 | 0.5707 | 0.4755 | 1.0283 | 1.3347 |
| PNKP   | 1.2577 | 2.3257 | 0.8181 | 1.5546 |
| PRDX1  | 1.1179 | 0.8223 | 1.2572 | 1.1069 |
| PRDX2  | 1.7787 | 1.6107 | 0.9864 | 1.344  |
| PRDX3  | 0.9665 | 0.5774 | 0.6975 | 0.6314 |
| PRDX4  | 0.9532 | 0.7833 | 0.9204 | 1.04   |
| PRDX5  | 0.7905 | 1.3544 | 0.8352 | 1.0841 |
| PRDX6  | 0.8356 | 1.0408 | 1.0572 | 1.2982 |
| PREX1  | 2.5683 | 1.889  | 0.7847 | 0.6184 |
| PRNP   | 0.7796 | 1.4821 | 0.9796 | 1.0766 |
| PTGS1  | 0.5908 | 0.3836 | 0.8352 | 2.3892 |
| PTGS2  | 0.2854 | 0.2887 | 1.0355 | 0.7991 |
| PXDN   | 0.1191 | 0.1014 | 1.4047 | 1.6319 |
| RNF7   | 0.6929 | 1.3733 | 1.1253 | 1.4913 |
| SCARA3 | 1.0287 | 1.5238 | 0.2366 | 0.1172 |
| VIMP   | 1.1102 | 1.4316 | 0.7072 | 0.957  |
| SEPP1  | 0.6202 | 0.3836 | 1.1731 | 1.3072 |
| SFTPD  | 0.5908 | 0.3836 | 0.7847 | 0.6184 |
| SIRT2  | 0.9868 | 1.6331 | 0.7271 | 1.1302 |
| SOD1   | 1.0145 | 0.6587 | 1.0499 | 0.6314 |
| SOD2   | 0.9271 | 0.6772 | 0.8647 | 0.7827 |
| SOD3   | 0.5908 | 0.3836 | 0.4538 | 0.4719 |
| SQSTM1 | 1.8287 | 2.2002 | 0.5323 | 0.8867 |
| SRXN1  | 1.1899 | 2.4244 | 0.9268 | 1.749  |
| STK25  | 1.3859 | 1.9287 | 0.9268 | 1.2982 |
| TPO    | 0.5908 | 0.3836 | 0.7847 | 0.6184 |
| TTN    | 0.5908 | 1.1955 | 0.7847 | 0.6184 |
| TXN    | 1.1025 | 0.7833 | 1.0427 | 0.7202 |
| TXNRD1 | 1.4854 | 1.5132 | 0.7793 | 1.3347 |
| TXNRD2 | 1.2404 | 1.9154 | 0.8528 | 1.1146 |
| UCP2   | 0.5908 | 0.3836 | 0.5397 | 0.5891 |

**Table S2.** List of shRNA and CRISPR/Cas9 plasmids. Plasmids were constructed by cloning the following double stranded oligos into the backbone plasmids indicated.

| Plasmid Name                     | 5'-oligo                                                                                 | 3'-oligo                                                                                 | Plasmid Backbone                   |
|----------------------------------|------------------------------------------------------------------------------------------|------------------------------------------------------------------------------------------|------------------------------------|
| pSUPER-retro-puro-ANXA2 shRNA1   | 5'-GAT CCC CCC TGG TTC AGT GCA TTC AGT TCA<br>AGA GAC TGA ATG CAC TGA ACC AGG TTT TTA-3' | 5'-AGC TTA AAA ACC TGG TTC AGT GCA TTC AGT CTC TTG<br>AAC TGA ATG CAC TGA ACC AGG GGG-3' | pSUPER-retro-puro<br>(Oligoengine) |
| pSUPER-retro-puro-ANXA2 shRNA2   | 5'-GAT CCC CGT GCA TAT GGG TCT GTC AAT TCA<br>AGA GAT TGA CAG ACC CAT ATG CAC TTT TTA-3' | 5'-AGC TTA AAA AGT GCA TAT GGG TCT GTC AAT CTC TTG<br>AAT TGA CAG ACC CAT ATG CAC GGG-3' | pSUPER-retro-puro<br>(Oligoengine) |
| pSUPER-retro-puro-ANXA2 scramble | 5'-GAT CCC CGT GCA TAT GGG TCT GTC CAT TAG<br>AGA GAT TGA CAG ACC CAT ATG CAC TTT TTA-3' | 5'-AGC TTA AAA AGT GCA TAT GGG TCT GTC AAT CTC TCT<br>AAT GGA CAG ACC CAT ATG CAC GGG-3' | pSUPER-retro-puro<br>(Oligoengine) |
| pSUPER-retro-neo-ANXA2 shRNA1    | 5'-GAT CCC CCC TGG TTC AGT GCA TTC AGT TCA<br>AGA GAC TGA ATG CAC TGA ACC AGG TTT TTA-3' | 5'-AGC TTA AAA ACC TGG TTC AGT GCA TTC AGT CTC TTG<br>AAC TGA ATG CAC TGA ACC AGG GGG-3' | pSUPER-neo-puro<br>(Oligoengine)   |
| pSUPER-retro-neo-ANXA2 shRNA2    | 5'-GAT CCC CGT GCA TAT GGG TCT GTC AAT TCA<br>AGA GAT TGA CAG ACC CAT ATG CAC TTT TTA-3' | 5'-AGC TTA AAA AGT GCA TAT GGG TCT GTC AAT CTC TTG<br>AAT TGA CAG ACC CAT ATG CAC GGG-3' | pSUPER-neo-puro<br>(Oligoengine)   |
| pSUPER-retro-neo-ANXA2 scramble  | 5'-GAT CCC CGT GCA TAT GGG TCT GTC CAT TAG<br>AGA GAT TGA CAG ACC CAT ATG CAC TTT TTA-3' | 5'-AGC TTA AAA AGT GCA TAT GGG TCT GTC AAT CTC TCT<br>AAT GGA CAG ACC CAT ATG CAC GGG-3' | pSUPER-neo-puro<br>(Oligoengine)   |
| pANXA2-gRNA1-px459-V2            | 5'-CAC CGC TAC ACC CCC AAG TGC ATA T-3'                                                  | 5'-AAA CAT ATG CAC TTG GGG GTG TAG C-3'                                                  | px459-V2 (Addgene:<br>62988)       |
| pANXA2-gRNA2-px459-V2            | 5'-CAC CGC TCA GCA TCA AAG TTA GTA T-3'                                                  | 5'-AAA CAT ACT AAC TTT GAT GCT GAG C-3'                                                  | px459-V2 (Addgene:<br>62988)       |

**Table S3.** Antibodies list.

| Target Protein              | Reference   | Company                         | Procedure                                  |
|-----------------------------|-------------|---------------------------------|--------------------------------------------|
| ANXA2 (D1/274.5)            |             | Produced In house               | Western blotting                           |
| PTEN (A2B1)                 | sc-7974     | Santa Cruz Biotechnology (SCBT) | Western blotting                           |
| PRDX1                       | sc-7381     | SCBT                            | Western blotting                           |
| PRDX2 (N-13)                | sc-23967    | SCBT                            | Western blotting;<br>Immunofluorescence-IF |
| P-AKT Ser 473               | sc-7985-R   | SCBT                            | Western blotting                           |
| P-AKT Thr 308               | 9275        | Cell Signaling Technology (CST) | Western blotting                           |
| AKT                         | 9272        | CST                             | Western blotting                           |
| P-ERK 1/2                   | sc-16982    | SCBT                            | Western blotting                           |
| ERK 1/2 (MK1)               | sc-135900   | SCBT                            | Western blotting                           |
| H-Ras                       | sc-520      | SCBT                            | Western blotting                           |
| GAPDH                       | sc-25778    | SCBT                            | Western blotting                           |
| $\beta$ -tubulin            | sc-5286     | SCBT                            | Western blotting                           |
| actin (C-11)                | sc-1615     | SCBT                            | Western blotting                           |
| p-4EBPI (62.Ser 65)         | sc-293124   | SCBT                            | Western blotting                           |
| SQSTM1 (D-3)                | sc-28359    | SCBT                            | Western blotting                           |
| MTH1 (H-1)                  | sc-271082   | SCBT                            | Western blotting                           |
| catalase (H-9)              | sc-271803   | SCBT                            | Western blotting                           |
| SOD-1 (G-11)                | sc-17767    | SCBT                            | Western blotting                           |
| Trx (A-5)                   | sc-166393   | SCBT                            | Western blotting                           |
| GSR (C-10)                  | sc-133245   | SCBT                            | Western blotting                           |
| GPX-3                       | sc-58361    | SCBT                            | Western blotting                           |
| TrxRD (B-2)                 | sc-28321    | SCBT                            | Western blotting                           |
| GFP (FL)                    | sc-8334     | SCBT                            | Immunoprecipitation (IP)                   |
| Rabbit IgG                  | NI01-100UG  | Merk                            | IP                                         |
| ANXA2                       | ab41803-100 | AbCam                           | IF                                         |
| S100A10 (4E7E10)            | sc-81153    | SCBT                            | IF                                         |
| hnRNP A2/B1 (B-7)           | sc-374053   | SCBT                            | IF                                         |
| anti-mouse 488 Alexa Fluor  | A-11001     | Molecular Probes                | IF                                         |
| anti-rabbit 488 Alexa Fluor | A-11008     | Molecular Probes                | IF                                         |
| anti-goat 488 Alexa Fluor   | A-11055     | Molecular Probes                | IF                                         |
| anti-mouse 546 Alexa Fluor  | A-11003     | Molecular Probes                | IF                                         |

**Table S4.** qRT-PCR primers list.

| Gene     | Forward Primer                        | Reverse Primer                        |
|----------|---------------------------------------|---------------------------------------|
| PRDX2    | 5'-GTC CTT CGC CAG ATC ACT GT-3'      | 5'-ACG TTG GGC TTA ATC GTG TC-3'      |
| EPHX2    | 5'-GTG TTC ATT GGC CAT GAC TG-3'      | 5'-CTC AGT GAC CAT CCT GCT GA-3'      |
| SrxN1    | 5'-GGG CTG GAC CCA CTG TAG TA-3'      | 5'-CCA GGG ACT CTT GGT TTT CA-3'      |
| NUDT1    | 5'-AAG AAG GAG AGA CCA TCG AGG AT-3'  | 5'-TGC AGG GCG TCC ACT GT-3'          |
| CATALASE | 5'-TGA CCG AGA GAG AAT TCC TGA-3'     | 5'-CCT TTG CCT TGG AGT ATT TGG-3'     |
| SCARA-3  | 5'-TGC GGA TTC TTT ACC TCT TCC T-3'   | 5'-TCT TCG GAG AGA GAG TCC ACT TTT-3' |
| TxnRD1   | 5'-TTC ACC TCA GTT TTC TTC ACT CC-3'  | 5'-TCT GCC CTC CTG ATA AGC AA-3'      |
| TxnRD2   | 5'-GGT GGA CTA CGT GGA ACC TT-3'      | 5'-TCT GCC ATC TTC CTC CAG TCA-3'     |
| RPLP0    | 5'-AGA CAA TGT GGG CTC CAA GCA GAT-3' | 5'-GCA TCA TGG TGT TCT TGC CCA TCA-3' |

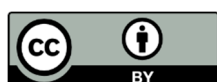

© 2019 by the authors. Submitted for possible open access publication under the terms and conditions of the Creative Commons Attribution (CC BY) license (<http://creativecommons.org/licenses/by/4.0/>).
